# Supplementary material for: Prediction of protein motions from amino acid sequence and its application to protein-protein interaction
Source: Springer Nature journal article supplement (doi:10.1186/1472-6807-10-20), 2010-01-01
Supplement: Additional file 10 [file 1472-6807-10-20-s10.pdf]

## Additional file 10

**Table S3 – The average and standard deviation of normalized NMA score in each category**

| Motion          | Flexible    |           | Normal      |           | Rigid       |           |
|-----------------|-------------|-----------|-------------|-----------|-------------|-----------|
|                 | <i>avg.</i> | <i>SD</i> | <i>avg.</i> | <i>SD</i> | <i>avg.</i> | <i>SD</i> |
| internal motion | -0.248      | 0.919     | 0.138       | 0.969     | 0.423       | 1.067     |
| external_short  | -0.309      | 0.783     | -0.056      | 0.841     | 0.179       | 0.908     |
| external_long   | -0.301      | 0.813     | -0.076      | 0.883     | 0.188       | 0.990     |

Herein, *avg.* and *SD* respectively signify the average and standard deviation of the normalized NMA score in each category.
